# Supplementary figures and images for: Influencing Activity of Bats by Dimly Lighting Wind Turbine Surfaces with Ultraviolet Light
Source: MDPI journal article supplement (doi:10.3390/ani12010009), 2021-12-21

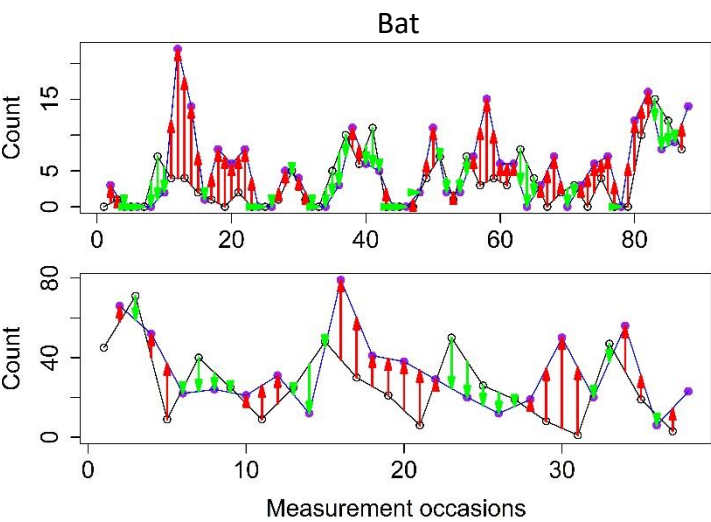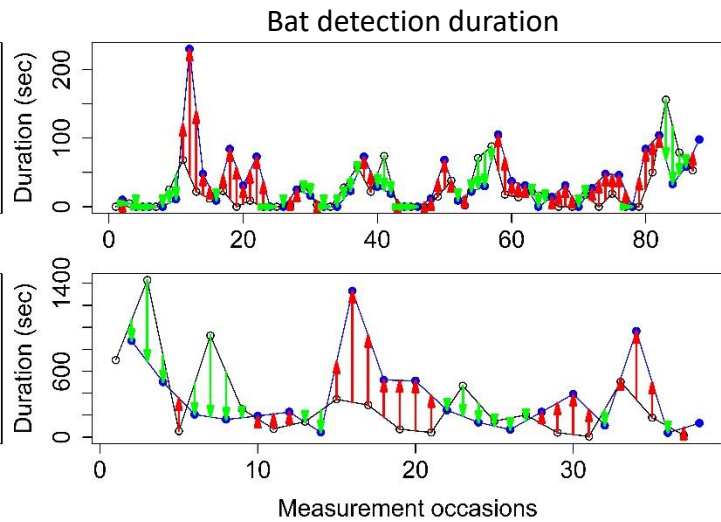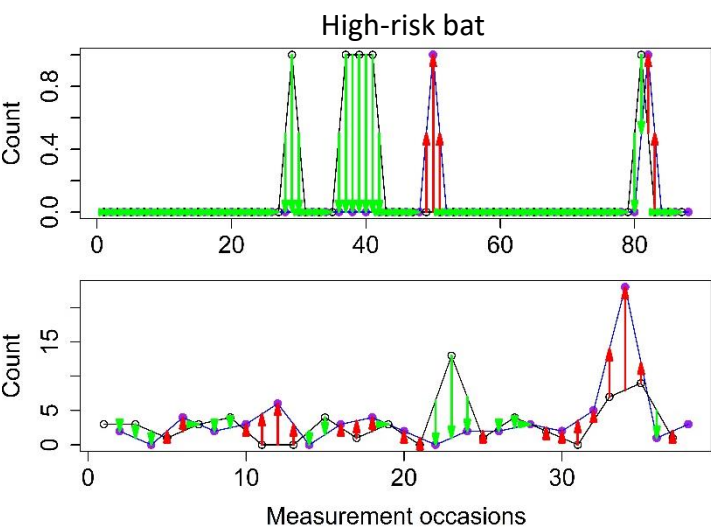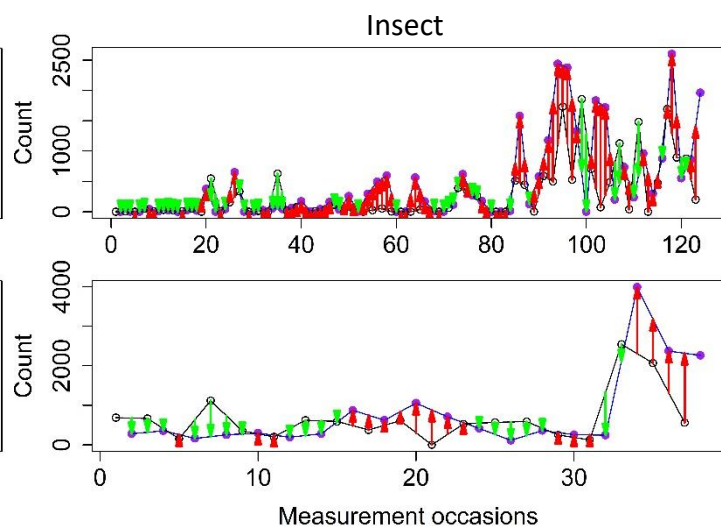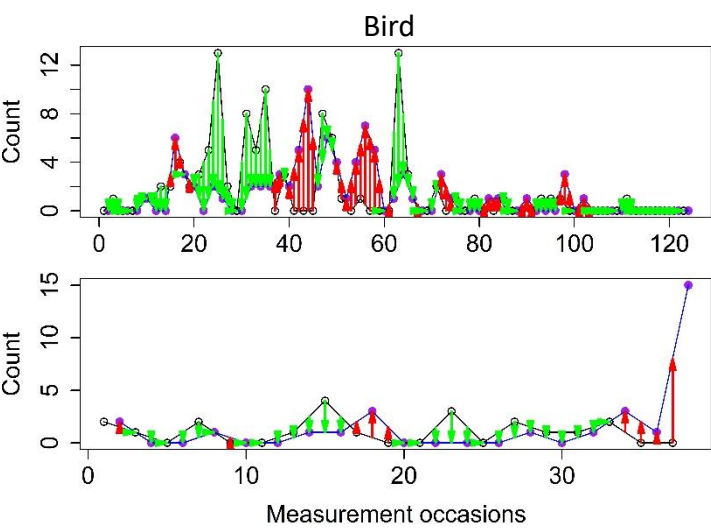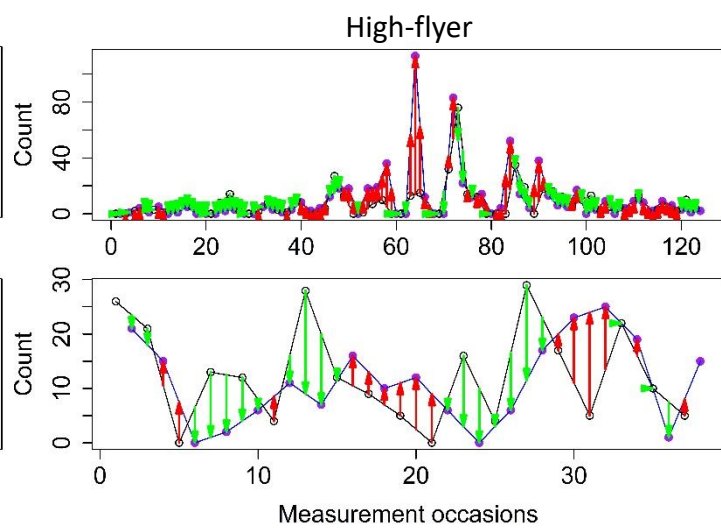

Supplement: s1 [file s1]
